# Supplementary material for: Extrapulmonary Mycobacterium abscessus Infections, France, 2012–2020
Source: PubMed Central journal article supplement (PMC11521186; doi:10.3201/eid3011.240459), 2024-11
Supplement: 24-0459-Techapp-s1.pdf [file 24-0459-Techapp-s1.pdf]

*EID cannot ensure accessibility for supplementary materials supplied by authors. Readers who have difficulty accessing supplementary content should contact the authors for assistance.*

# Extrapulmonary *Mycobacterium abscessus* Infections, France, 2012–2020

## Appendix

**Appendix Table 1.** Medical background, geographic origin and symptoms of extrapulmonary *M. abscessus* infections\*

| N° | Age (years*) | Infection site | Diagnostic sample                | Geographic origin   | Underlying diseases                       | B symptoms | Skin involvement | Trauma-infection delay (months) | Health care associated |
|----|--------------|----------------|----------------------------------|---------------------|-------------------------------------------|------------|------------------|---------------------------------|------------------------|
| 1  | 60           | BJI (Sp)       | Discovertebral biopsy (C6-7)     | South America       |                                           | +          | -                | 24                              | -                      |
| 2  | 80           | BJI (Sp)       | Discovertebral biopsy (L3-4)     | Sub-Saharan Africa  |                                           | +          | -                | 72                              | +                      |
| 3  | 40           | BJI (Art)      | Synovial fluid (Steroclavicular) | Northern Africa     |                                           | -          | -                | -                               | -                      |
| 4  | 70           | BJI (Art)      | Synovial fluid (Knee)            | Metropolitan France |                                           | +          | -                | 24                              | +                      |
| 5  | 40           | BJI (Art)      | Synovial fluid (Knee)            | French Guyana       |                                           | +          | -                | 0.25                            | -                      |
| 6  | 60           | BJI (Art)      | Synovial fluid (Knee)            | Metropolitan France |                                           | +          | +                | 7                               | +                      |
| 7  | 60           | BJI (Art)      | Synovial fluid (Knee)            | Sub-Saharan Africa  |                                           | -          | -                | 0.5                             | +                      |
| 8  | 10           | BJI (Art)      | Synovial fluid (Knee)            | Metropolitan France | Explored at NRC, no IEI evidenced         | +          | -                | -                               | -                      |
| 9  | 80           | BJI (Art)      | Synovial fluid (Wrist)           | French West Indies  |                                           | -          | +                | 3                               | +                      |
| 10 | 70           | BJI (PJI)      | Synovial fluid (Hip)             | Sub-Saharan Africa  |                                           | -          | -                | 1                               | +                      |
| 11 | 50           | BJI (Ost)      | Bone (Tibia)                     | French West Indies  |                                           | -          | +                | 1                               | -                      |
| 12 | 0            | BJI (Ost)      | Contiguous abscess (Femur)       | Sub-Saharan Africa  |                                           | -          | +                | 6                               | +                      |
| 13 | 10           | BJI (Ost)      | Bone (Tibia)                     | French polynesia    |                                           | +          | -                | 3                               | -                      |
| 14 | 70           | BJI (Ost)      | Bone (Heel)                      | North America       | Myasthenia                                | -          | -                | 6                               | +                      |
| 15 | 100          | SSTI           | Skin biopsy                      | Metropolitan France |                                           | -          | +                | -                               | -                      |
| 16 | 50           | SSTI           | Blood cultures                   | Metropolitan France | Crohn disease, <i>M. marinum</i> SSTI     | -          | +                | -                               | -                      |
| 17 | 60           | SSTI           | Skin biopsy                      | Southeast Asia      |                                           | -          | +                | 72                              | +                      |
| 18 | 30           | SSTI           | Skin biopsy                      | Southeast Asia      |                                           | -          | +                | 1.5                             | +                      |
| 19 | 40           | SSTI           | Skin biopsy                      | Metropolitan France |                                           | -          | +                | 1                               | -                      |
| 20 | 50           | SSTI           | Skin biopsy                      | French West Indies  | Kidney allograft                          | +          | +                | -                               | -                      |
| 21 | 60           | SSTI           | Skin biopsy                      | French West Indies  | Kidney allograft, <i>M. chelonae</i> SSTI | -          | +                | -                               | -                      |
| 22 | 80           | SSTI           | Skin biopsy                      | French West Indies  | Kikuchi & Sjogren Syndromes               | -          | +                | -                               | -                      |
| 23 | 70           | SSTI           | Skin biopsy                      | Sub-Saharan Africa  | AL amyloidosis, Multiple Myeloma          | -          | +                | -                               | -                      |
| 24 | 80           | SSTI           | Skin biopsy                      | Metropolitan France | Idiopathic pulmonary fibrosis             | -          | +                | -                               | -                      |
| 25 | 70           | LNI Ing.       | Lymph node biopsy                | Sub-Saharan Africa  |                                           | -          | +                | 2                               | -                      |
| 26 | 30           | LNI Med.       | 3 sputums                        | Central America     | Sharp Syndrome                            | -          | -                | -                               | -                      |
| 27 | 10           | LNI Cerv.      | Lymph node biopsy                | La Réunion Island   | Explored at NRC, no IEI evidenced         | -          | -                | 0.25                            | -                      |
| 28 | 40           | LNI Cerv.      | Lymph node biopsy                | Metropolitan France |                                           | +          | -                | -                               | -                      |
| 29 | 80           | LNI Med.       | 2 sputums                        | New Caledonia       |                                           | +          | -                | -                               | -                      |

| N° | Age (years*) | Infection site | Diagnostic sample                                | Geographic origin   | Underlying diseases                                                                                      | B symptoms | Skin involvement | Trauma-infection delay (months) | Health care associated |
|----|--------------|----------------|--------------------------------------------------|---------------------|----------------------------------------------------------------------------------------------------------|------------|------------------|---------------------------------|------------------------|
| 30 | 30           | LNI Cerv.      | Lymph node biopsy                                | Southeast Asia      |                                                                                                          | -          | -                | -                               | -                      |
| 31 | 50           | LNI Cerv.      | Lymph node biopsy                                | Metropolitan France | Pharyngeal epidermoid carcinoma                                                                          | -          | +                | 3                               | +                      |
| 32 | 10           | LNI Med.       | Bronchoalveolar lavage                           | Sub-Saharan Africa  | Steroids for sarcoidosis suspicion                                                                       | -          | -                | -                               | -                      |
| 33 | 50           | BII            | Postoperative abscess                            | La Réunion Island   |                                                                                                          | -          | +                | 3                               | +                      |
| 34 | 30           | BII            | Postoperative abscess                            | La Réunion Island   |                                                                                                          | -          | +                | 1                               | +                      |
| 35 | 40           | Breast         | Breast abscess                                   | Western Europe      |                                                                                                          | -          | +                | 84                              | +                      |
| 36 | 80           | Bacteremia     | Blood culture                                    | Eastern Europe      | Autograft/lymphoma 10 years ago                                                                          | +          | -                | -                               | -                      |
| 37 | 0            | IC & B         | Blood culture                                    | Middle East         | Ewing sarcoma                                                                                            | +          | -                | 1                               | +                      |
| 38 | 70           | IC & B         | Blood culture                                    | Metropolitan France | Cardia adenocarcinoma                                                                                    | -          | -                | NA                              | +                      |
| 39 | 50           | IC & B         | Blood culture                                    | Metropolitan France | Laryngeal epidermoid carcinoma                                                                           | -          | -                | NA                              | +                      |
| 40 | 50           | MSI            | Bronchoalveolar lavage                           | Sub-Saharan Africa  | HIV2, PML                                                                                                | +          | -                | -                               | -                      |
| 41 | 70           | MSI            | Skin biopsy                                      | La Réunion Island   |                                                                                                          | +          | +                | 1                               | +                      |
| 42 | 20           | MSI            | Skin biopsy<br>Synovial fluid                    | French West Indies  | Inborn error of Immunity, (NEMO)<br><i>M. intracellulare</i> then <i>M. avium</i><br>SSTI 5 years before | +          | +                | -                               | -                      |
| 43 | 70           | MSI            | 3 sputums                                        | Sub-Saharan Africa  |                                                                                                          | +          | -                | -                               | -                      |
| 44 | 60           | BTI            | Removed biliary prosthesis                       | Metropolitan France | Kidney allograft                                                                                         | +          | -                | 12                              | +                      |
| 45 | 80           | BTI            | Surgical site infection after<br>cholecystectomy | Metropolitan France |                                                                                                          | -          | +                | 3                               | +                      |

\*B, implantable catheter infection & bacteremia; IEI, inborn error of immunity; LNI, lymph nodes infection (cerv, cervical; med, mediastinal; ing, inguinal), MSI: multisite infection; NA, not available; NRC, national reference centre; PJI, prosthetic joint infection; PML, progressive multifocal leukoencephalopathy; SSTI, skin & soft tissue infection.

**Appendix Table 2.** Microbiology, treatment and outcome of 45 cases of extrapulmonary *M. abscessus* infections

| N° | Age, y* | Infection site | Mab subspecies <i>erm(41)</i> sequevar | Initial surgery | Initial intensive antibiotic regimen                         | Initial antibiotic duration | Maintenance antibiotic regimen         | Total antibiotic duration | Outcome                        |
|----|---------|----------------|----------------------------------------|-----------------|--------------------------------------------------------------|-----------------------------|----------------------------------------|---------------------------|--------------------------------|
| 1  | 60      | BJI (Sp)       | <i>Abscessus</i> T28                   | -               | Clarithromycin, Imipenem, Cefoxitin, Amikacin, Tigecycline   | 1.5 mo                      | Clarithromycin, Clofazimine, Linezolid | 10 mo                     | Cured                          |
| 2  | 80      | BJI (Sp)       | <i>Bolletii</i>                        | -               | Azithromycin, Cefoxitin, Amikacin, Cotrimoxazole             | 2 mo                        | Azithromycin, Imipenem, Linezolid      | 6 mo                      | Cured                          |
| 3  | 40      | BJI (Art)      | <i>Bolletii</i>                        | +               | Clarithromycin, Imipenem, Amikacin                           | 2 weeks                     | Clarithromycin, Linezolid              | 6 mo                      | Cured                          |
| 4  | 70      | BJI (Art)      | <i>Abscessus</i> T28                   | +               | Clarithromycin, Cefoxitin, Amikacin                          | 1 mo                        | Clarithromycin, Cefoxitin              | 5 mo                      | Cured                          |
| 5  | 40      | BJI (Art)      | <i>Massiliense</i>                     | +               | Imipenem, Amikacin                                           | 2 weeks                     | Clarithromycin                         | 6 mo                      | Cured                          |
| 6  | 60      | BJI (Art)      | <i>Abscessus</i> T28                   | +               | Clarithromycin, Cefoxitin, Amikacin                          | 2 mo                        | Clarithromycin, Cefoxitin              | 12 mo                     | Cured                          |
| 7  | 60      | BJI (Art)      | <i>Abscessus</i> C28                   | +               | Ofloxacin, Amikacin, Rifampin                                | 1 mo                        | Clarithromycin, Moxifloxacin           | 2 mo                      | Cured                          |
| 8  | 10      | BJI (Art)      | <i>Abscessus</i> T28                   | +               | Clarithromycin, Imipenem, Amikacin, Tigecycline              | 1 mo                        | Clarithromycin, Clofazimine            | 6 mo                      | Cured                          |
| 9  | 80      | BJI (Art)      | <i>Abscessus</i> T28                   | +               | Azithromycin, Amikacin, Clofazimine                          | 1.5 mo                      | Azithromycin, Clofazimine              | 6 mo                      | Cured                          |
| 10 | 70      | BJI (PJI)      | <i>Abscessus</i> T28                   | +               | Clarithromycin, Imipenem, Amikacin, Tigecycline, Clofazimine | 3 mo                        | Clarithromycin, Imipenem, Clofazimine  | 12 mo                     | Cured                          |
| 11 | 50      | BJI (Ost)      | <i>Massiliense</i>                     | +               | Imipenem, Amikacin, Tigecycline, Ciprofloxacin               | 2 mo                        | Clarithromycin, Amikacin, Tigecycline  | Planned for 12 mo         | Relapse then lost to follow-up |

| N° | Age, y* | Infection site | Mab subspecies <i>erm(41)</i> sequevar | Initial surgery | Initial intensive antibiotic regimen                                   | Initial antibiotic duration | Maintenance antibiotic regimen      | Total antibiotic duration | Outcome                         |
|----|---------|----------------|----------------------------------------|-----------------|------------------------------------------------------------------------|-----------------------------|-------------------------------------|---------------------------|---------------------------------|
| 12 | 0       | BJI (Ost)      | <i>Abscessus</i> C28                   | +               | Clarithromycin, Amikacin                                               | 2 weeks                     | Clarithromycin                      | 6 mo                      | Cured                           |
| 13 | 10      | BJI (Ost)      | <i>Abscessus</i> T28                   | +               | Surgery alone                                                          |                             |                                     |                           | Cured                           |
| 14 | 70      | BJI (Ost)      | <i>Massiliense</i>                     | +               | Azithromycin, Imipenem, Tigecycline                                    | 6 mo                        | Azithromycin, Imipenem, Tigecycline | 6 mo                      | Cured                           |
| 15 | 100     | SSTI           | <i>Abscessus</i> T28                   | -               | Local care alone                                                       |                             |                                     |                           | Cured                           |
| 16 | 50      | SSTI           | <i>Abscessus</i> T28                   | +               | Azithromycin, Amikacin, Linezolid                                      |                             |                                     |                           | Lost to follow-up at 1 mo       |
| 17 | 60      | SSTI           | <i>Abscessus</i> C28                   | +               | Rifampin<br>Clarithromycin, Cefoxitin, Amikacin                        | 3 mo                        | Clarithromycin                      | 9 mo                      | Cured                           |
| 18 | 30      | SSTI           | <i>Massiliense</i>                     | -               | Clarithromycin, Amikacin                                               | 1 mo                        |                                     |                           | Cured                           |
| 19 | 40      | SSTI           | <i>Bolletii</i>                        | +               | Azithromycin, Imipenem, Amikacin, Tigecycline                          | 2 weeks                     | Azithromycin, Imipenem, Tigecycline | Planned for 6 mo          | Lost to follow-up after 2 weeks |
| 20 | 50      | SSTI           | <i>Massiliense</i>                     | -               | Azithromycin, Cefoxitin, Amikacin                                      | 2 weeks                     | Azithromycin, Cefoxitin             | 3 mo                      | Cured                           |
| 21 | 60      | SSTI           | <i>Abscessus</i> T28                   | -               | Clarithromycin, Cefoxitin/Imipenem, Amikacin, Tigecycline, Clofazimine | 3 mo                        | Azithromycin, Clofazimine           | 15 mo                     | Cured                           |
| 22 | 80      | SSTI           | <i>Abscessus</i> T28                   | -               | Clarithromycin, Cefoxitin                                              | 2 mo                        | Imipenem, Rifabutin, Clofazimine    | 5 mo                      | Cured                           |
| 23 | 70      | SSTI           | <i>Abscessus</i> T28                   | -               | Clarithromycin, Linezolid                                              | 1 week                      |                                     |                           | Cured                           |
| 24 | 80      | SSTI           | <i>Bolletii</i>                        | -               | Local care<br>Clarithromycin, Cefoxitin                                | 3 weeks                     | Clarithromycin                      | 6 mo                      | Deceased after 6 mo             |
| 25 | 70      | LNI Ing.       | <i>Bolletii</i>                        | +               | Azithromycin,                                                          | 1.5 mo                      | Azithromycin,                       | 6 mo                      | Cured                           |

| N° | Age, y* | Infection site | Mab subspecies <i>erm(41)</i> sequevar | Initial surgery | Initial intensive antibiotic regimen                   | Initial antibiotic duration | Maintenance antibiotic regimen                           | Total antibiotic duration | Outcome                                        |
|----|---------|----------------|----------------------------------------|-----------------|--------------------------------------------------------|-----------------------------|----------------------------------------------------------|---------------------------|------------------------------------------------|
|    |         |                |                                        |                 | Imipenem/Cefoxitin, Amikacin, Tigecycline, Clofazimine |                             | Clofazimine                                              |                           |                                                |
| 26 | 30      | LNI Med.       | <i>Bolletii</i>                        | -               | Spontaneous improvement                                |                             |                                                          |                           | Cured                                          |
| 27 | 10      | LNI Cerv.      | <i>Massiliense</i>                     | +               | Clarithromycin                                         | 6 mo                        |                                                          |                           | Cured                                          |
| 28 | 40      | LNI Cerv.      | <i>Bolletii</i>                        | +               | Clarithromycin, Moxifloxacin                           | 1.5 mo                      | Azithromycin                                             | 3 mo                      | Cured                                          |
| 29 | 80      | LNI Med.       | <i>Abscessus</i> unspecified           | -               | Clarithromycin, Cefoxitin, Amikacin                    | 3 weeks                     | Clarithromycin, Imipenem                                 | 1 mo                      | Lost to follow-up after 1 mo                   |
| 30 | 30      | LNI Cerv.      | <i>Abscessus</i> T28                   | -               | Clarithromycin, Linezolid                              | 4 mo                        | Clarithromycin                                           | 6 mo                      | Cured                                          |
| 31 | 50      | LNI Cerv.      | <i>Massiliense</i>                     | +               | Surgery alone                                          |                             |                                                          |                           | Cured                                          |
| 32 | 10      | LNI Med.       | <i>Bolletii</i>                        | -               | Clarithromycin, Imipenem, Tigecycline                  | 3 mo                        | Clarithromycin, Inhaled Amikacin, Tigecycline, Linezolid | 6 mo                      | Cured                                          |
| 33 | 50      | BII            | <i>Abscessus</i> T28                   | +               | Azithromycin, Ciprofloxacin, Cotrimoxazole             | 2 mo                        | Cefoxitin, Amikacin, Tigecycline                         | 9 mo                      | Partial failure of on oral regimen, then cured |
| 34 | 30      | BII            | <i>Abscessus</i> C28                   | +               | Surgery alone                                          |                             |                                                          |                           | Cured                                          |
| 35 | 40      | Breast         | <i>Bolletii</i>                        | -               | Azithromycin, Cefoxitin, Amikacin                      | 6 mo                        | Azithromycin, Meronem, Amikacin                          | 9 mo                      | Relapse then cured                             |
| 36 | 80      | Bacteremia     | <i>Massiliense</i>                     | -               | Clarithromycin, Imipenem, Amikacin                     | 1 mo                        | Clarithromycin, Ciprofloxacin                            | Long-term                 | Cured                                          |
| 37 | 0       | IC & B         | <i>Abscessus</i> T28                   | +               | Ciprofloxacin, Clarithromycin                          | 1 week                      |                                                          |                           | Lost to follow-up at 1 week                    |

| N° | Age, y* | Infection site | Mab subspecies <i>erm(41)</i> sequevar | Initial surgery | Initial intensive antibiotic regimen                      | Initial antibiotic duration | Maintenance antibiotic regimen         | Total antibiotic duration | Outcome                                                              |
|----|---------|----------------|----------------------------------------|-----------------|-----------------------------------------------------------|-----------------------------|----------------------------------------|---------------------------|----------------------------------------------------------------------|
| 38 | 70      | IC & B         | <i>Massiliense</i>                     | -               | Cefoxitin, Amikacin                                       |                             |                                        |                           | Deceased before treatment                                            |
| 39 | 50      | IC & B         | <i>Abscessus</i> T28                   | -               | Deceased before treatment                                 |                             |                                        |                           | Deceased before treatment                                            |
| 40 | 50      | MSI            | <i>Abscessus</i> C28                   | -               | Deceased before treatment                                 |                             |                                        |                           | Deceased before treatment                                            |
| 41 | 70      | MSI            | <i>Abscessus</i> T28                   | -               | Local care alone                                          |                             |                                        |                           | Cured                                                                |
| 42 | 20      | MSI            | <i>Bolletii</i>                        | +               | 3 MAB antibiotic treatments in 5 y and multiple surgeries |                             |                                        |                           | Relapsed twice, multiple treatment side effects, ultimately improved |
| 43 | 70      | MSI            | <i>Abscessus</i> T28                   | +               | Azithromycin, Imipenem, Amikacin                          | 1 mo                        | Azithromycin, Imipenem, Linezolid      | 3 mo                      | Cured                                                                |
| 44 | 60      | BTI            | <i>Abscessus</i> C28                   | +               | Clarithromycin, Cefoxitin, Amikacin/Tigecycline           | 2 weeks                     | Clarithromycin, Cefoxitin, Clofazimine | 3 mo                      | Cured                                                                |
| 45 | 80      | BTI            | <i>Abscessus</i> T28                   | -               | Spontaneous abscess drainage and local care               |                             |                                        |                           | Cured                                                                |

\*ROUNDED. BII, breast implant infection; BJI, bone & joint infection; BJI (ART), arthritis; BJI (OST), osteitis; BJI (SP), spondylodiscitis; BTI, biliary tract infection; IC & B, implantable catheter infection and bacteremia; LNI, lymph nodes infection (cerv.: cervical, med.: mediastinal, ing.: inguinal); MSI, multisite infection; PJI, prosthetic joint infection; ssti, skin & soft tissue infection.

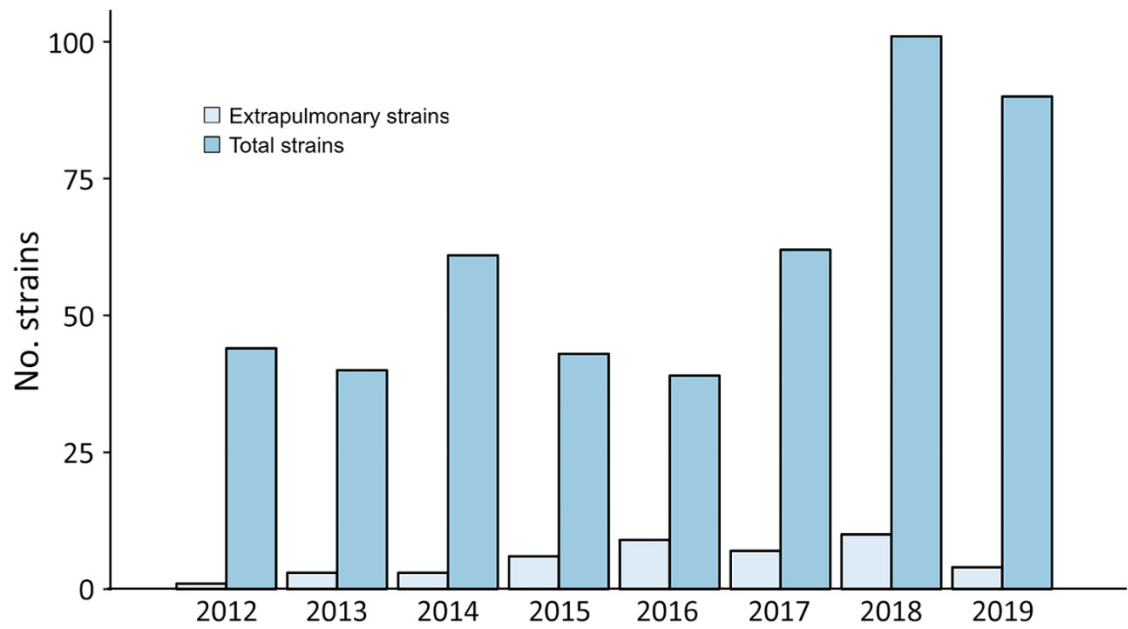

**Appendix Figure.** Annual count of total & extrapulmonary *M. abscessus* infections strains received by National Reference Centre (France, 2012-2019).
